# Supplementary material for: Targeted capture-based NGS is superior to multiplex PCR-based NGS for hereditary BRCA1 and BRCA2 gene analysis in FFPE tumor samples
Source: PubMed Central journal article supplement (PMC6487025; doi:10.1186/s12885-019-5584-6), 2019-04-27

**A Targeted capture-based NGS of 13 FFPE samples (P1 to P13)**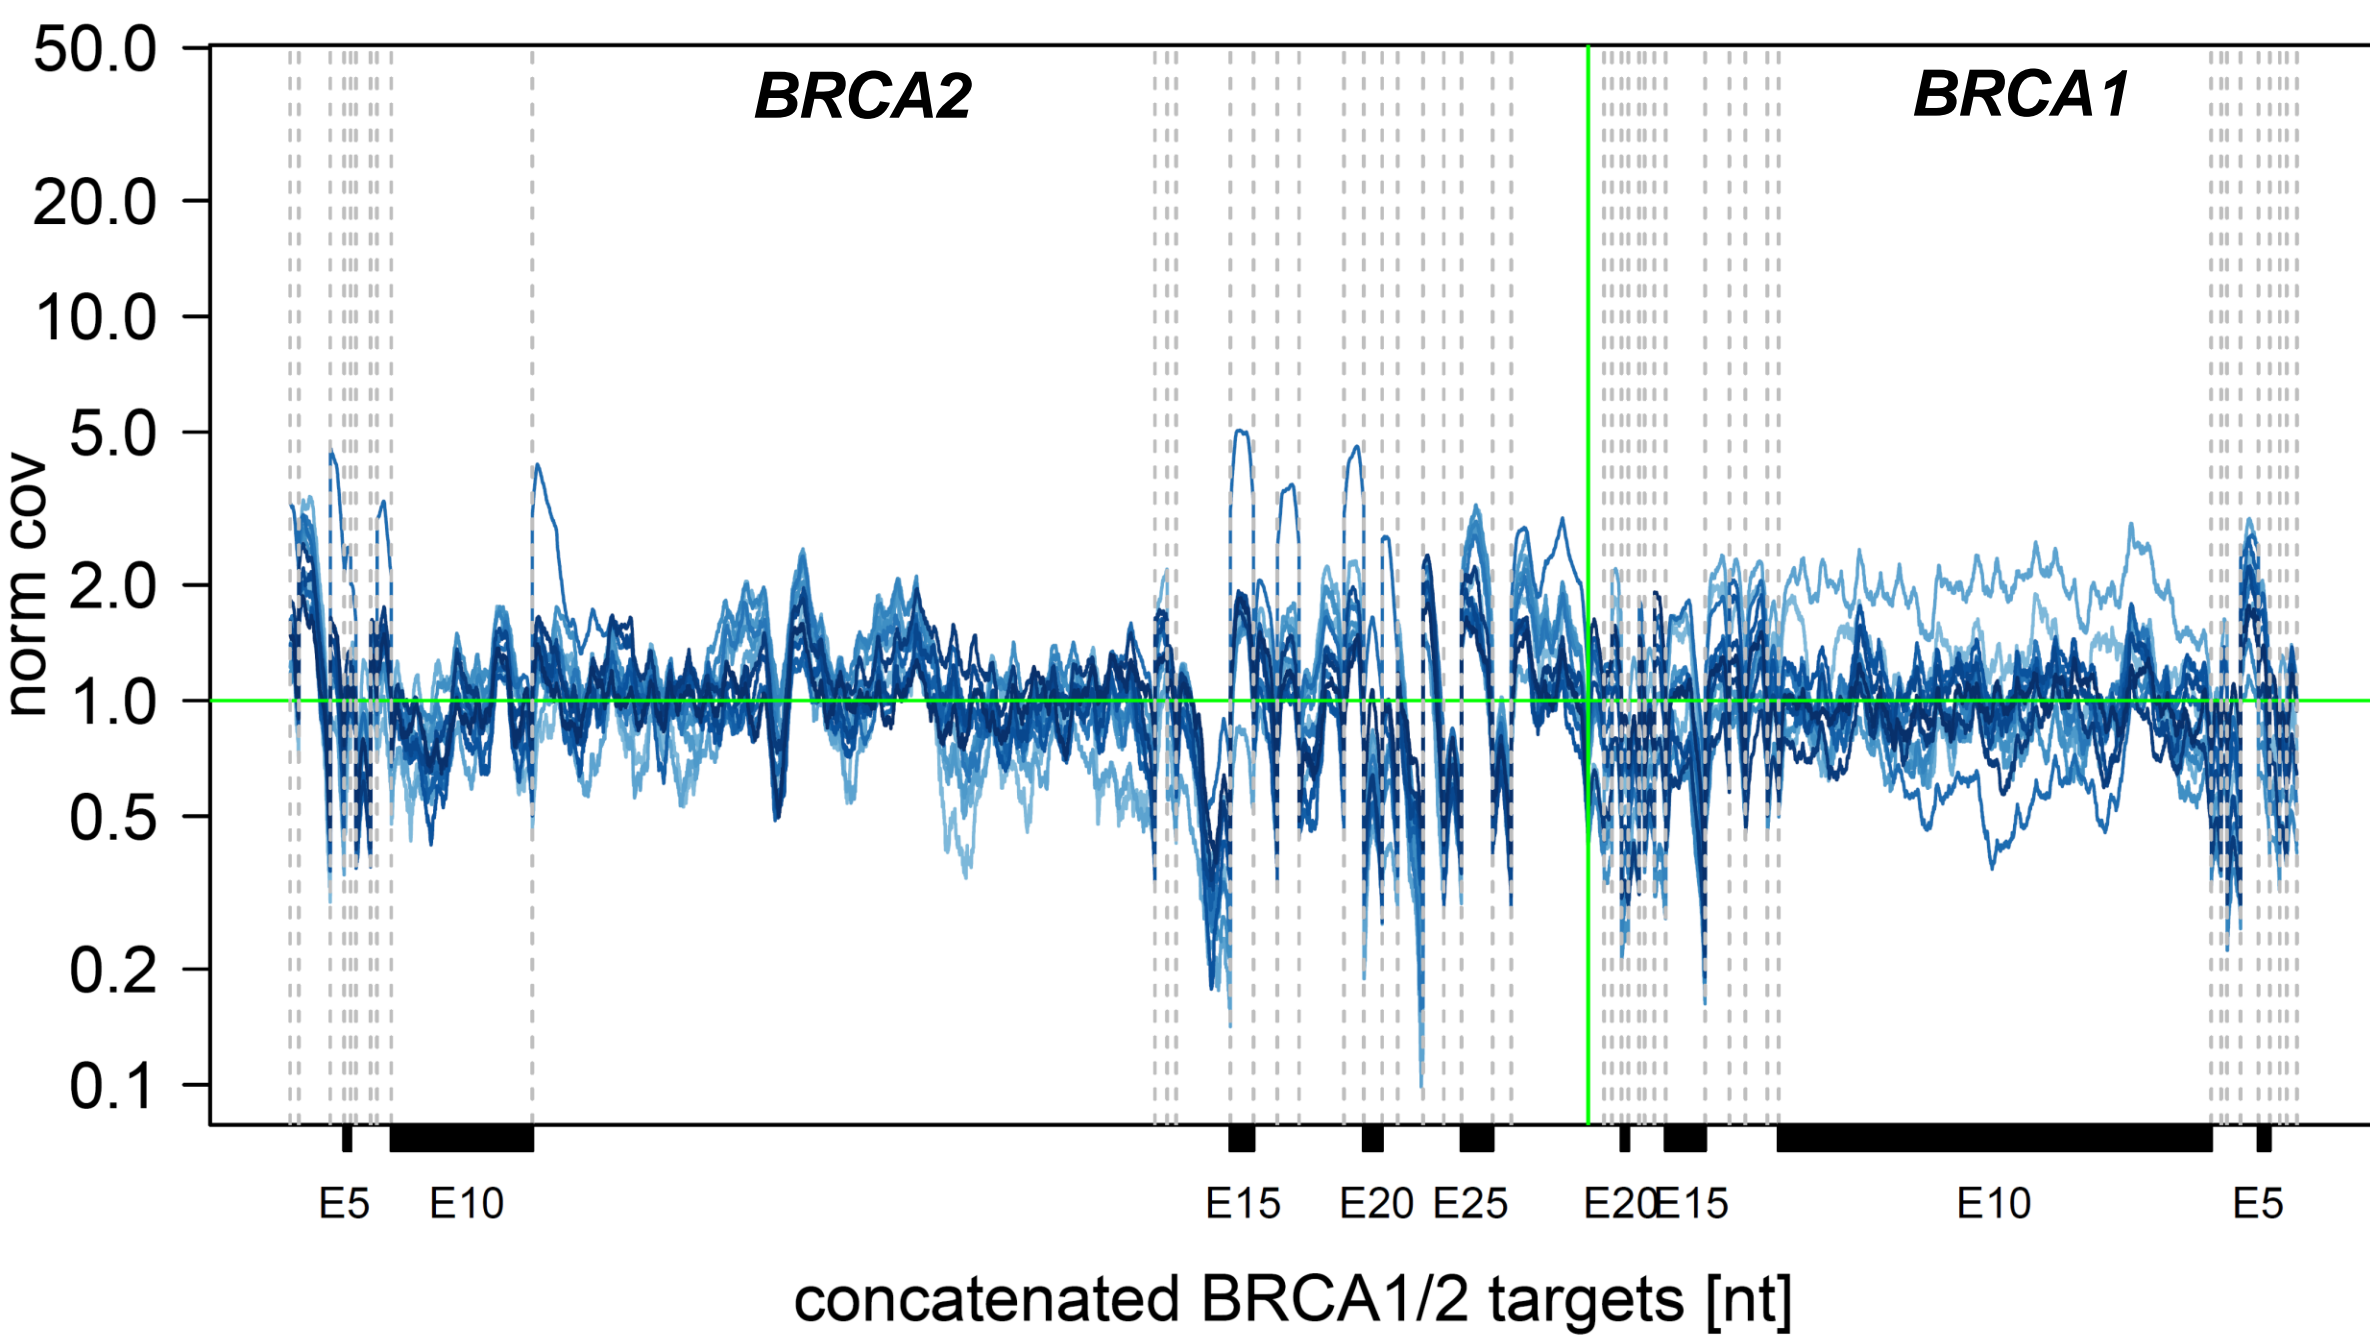**Multiplex PCR-based NGS of 13 FFPE samples (P1 to P13)**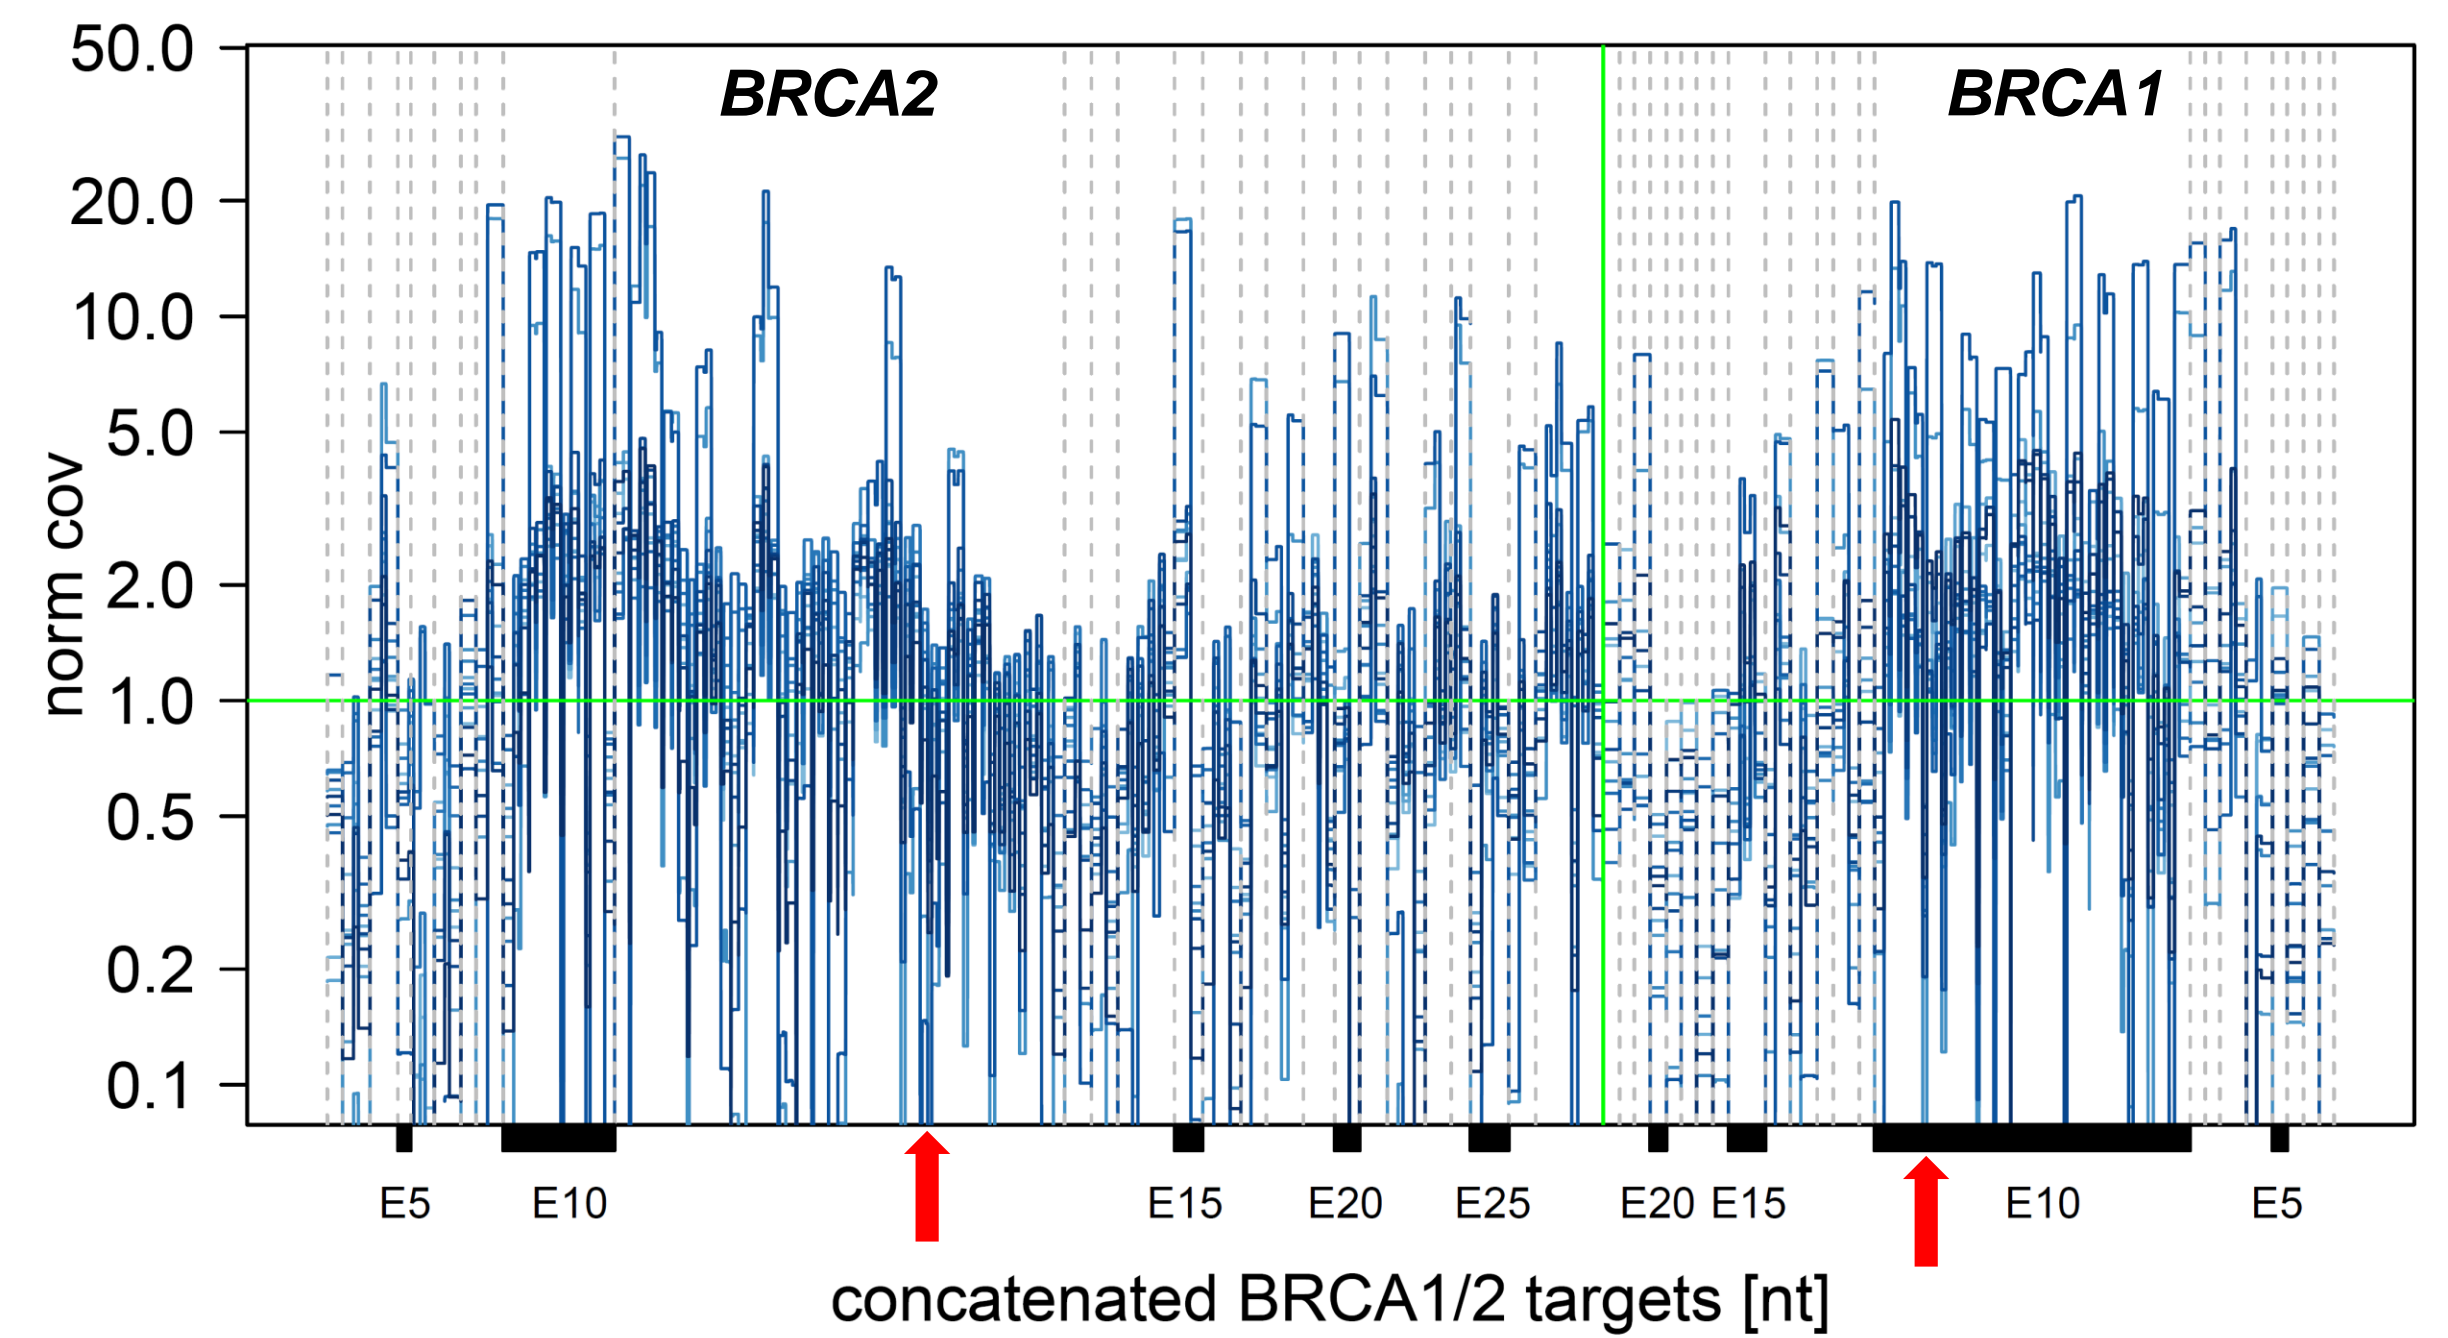**B Targeted capture-based NGS of 3 FFPE samples (P14 to P15)**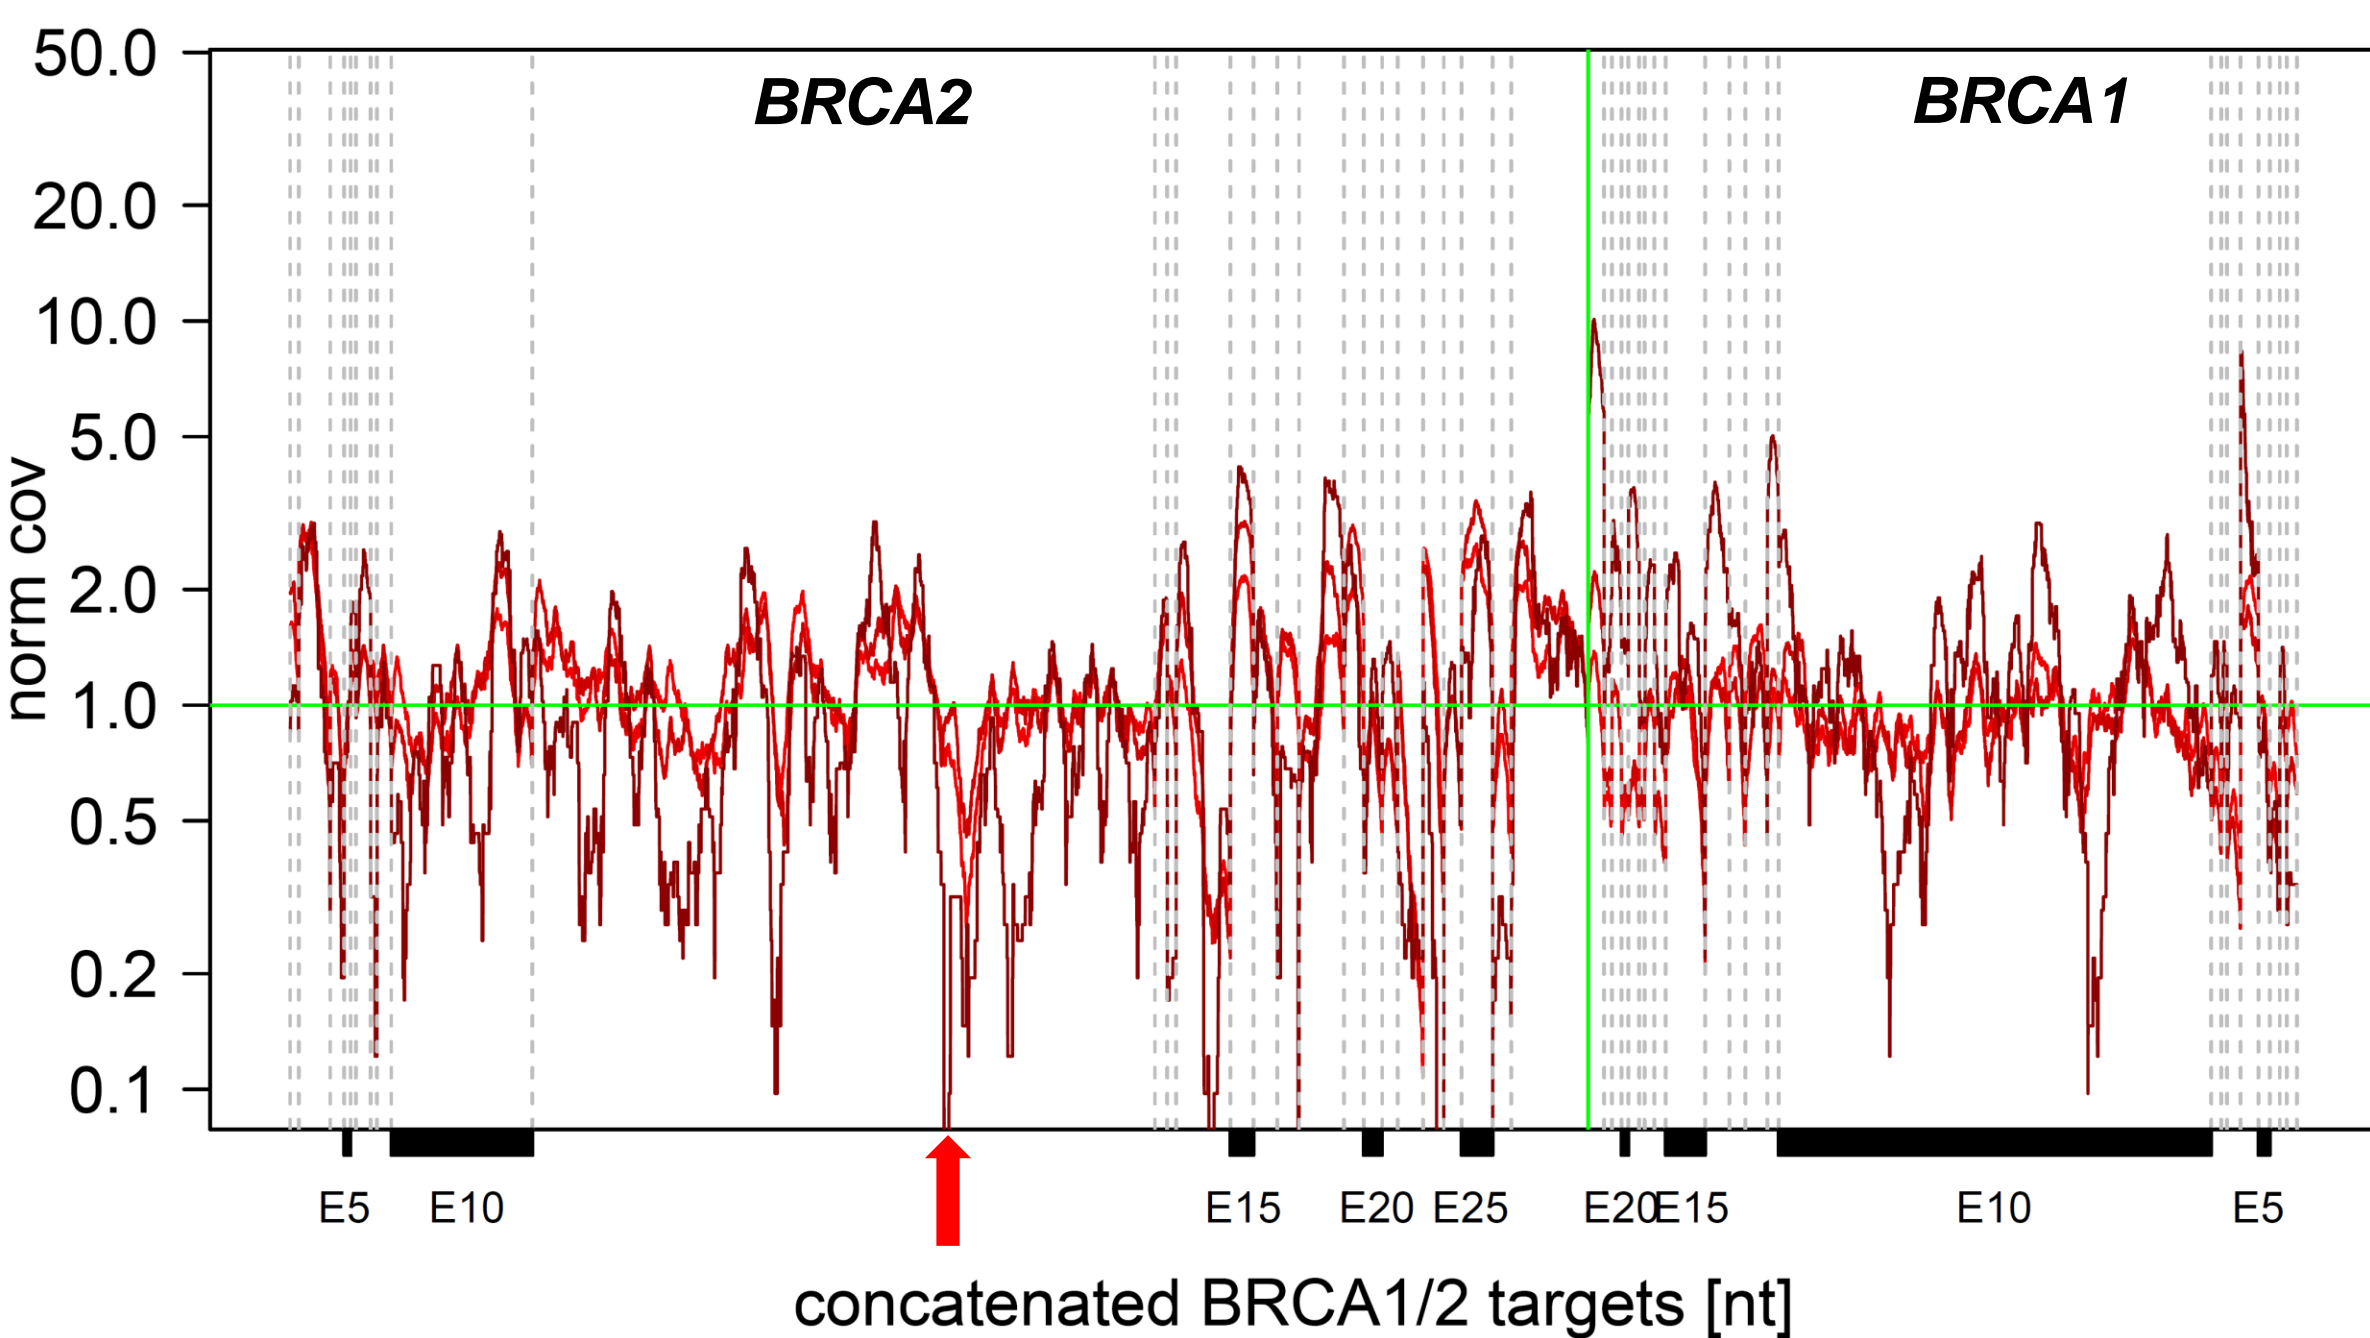**Multiplex PCR-based NGS of 3 FFPE samples (P14 to P15)**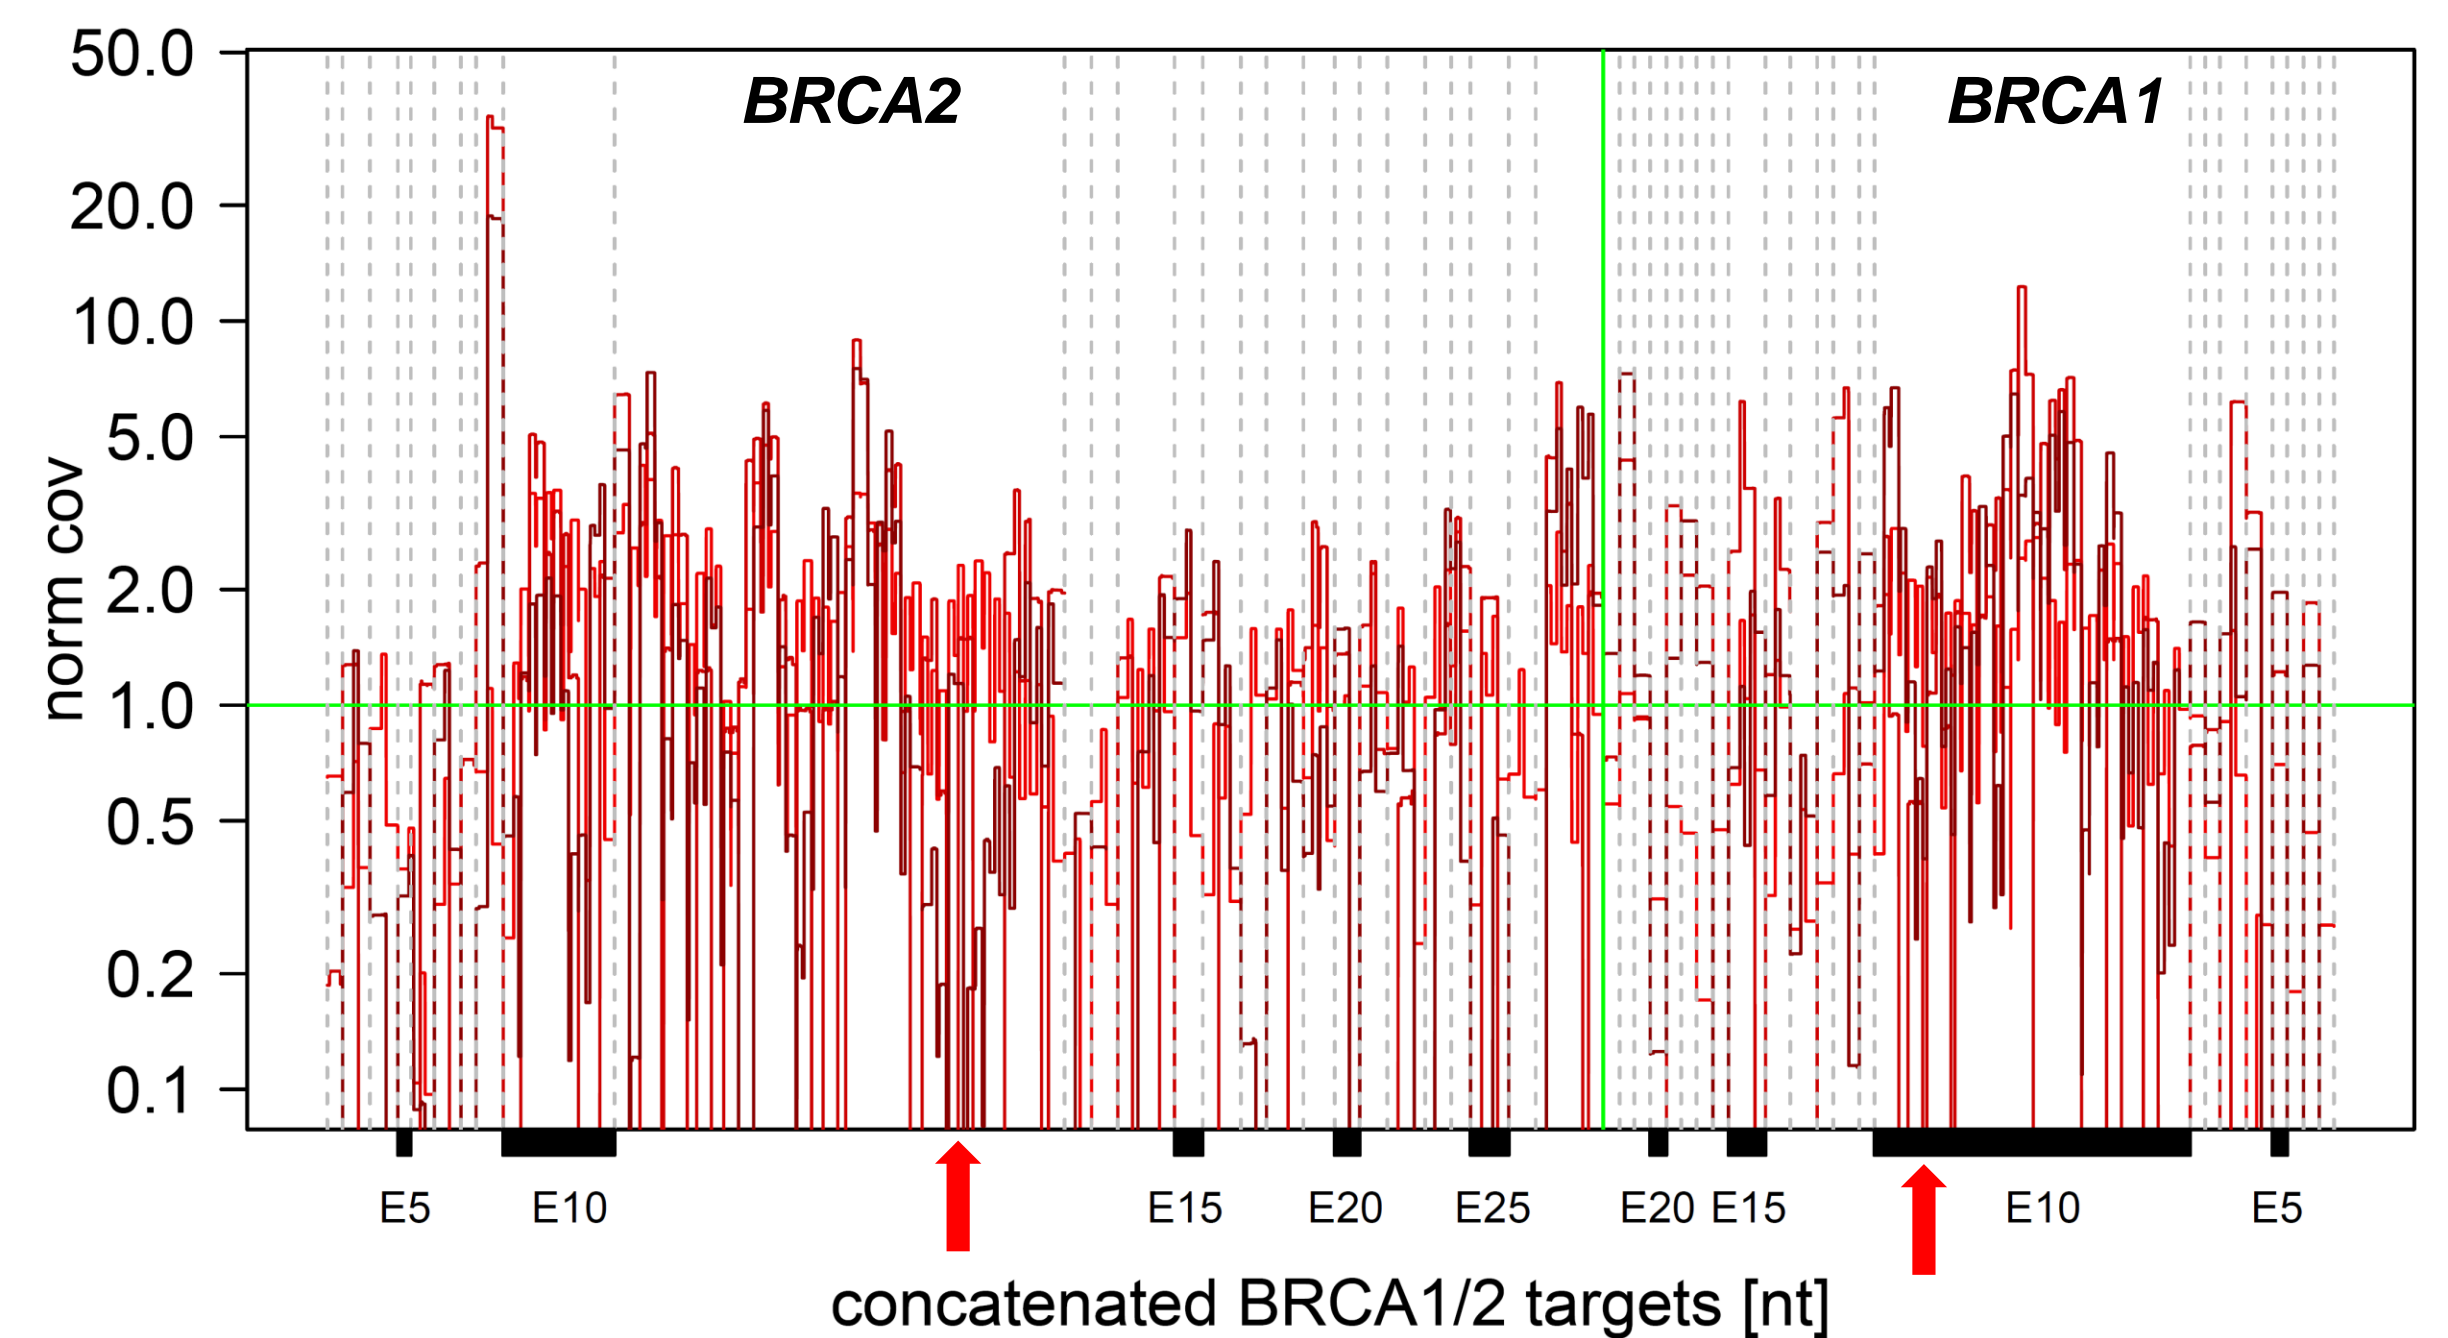

Supplement: 12885_2019_5584_MOESM1_ESM.pdf [file 12885_2019_5584_MOESM1_ESM.pdf]
