# Supplementary material for: Targeted capture-based NGS is superior to multiplex PCR-based NGS for hereditary BRCA1 and BRCA2 gene analysis in FFPE tumor samples
Source: BMC Cancer. 2019 Apr 27;19:396. doi: 10.1186/s12885-019-5584-6 (PMC6487025; doi:10.1186/s12885-019-5584-6)
Supplement: Supplementary file 4 — Table S3 Pathogenic variants and CNVs in FFPE samples from all patients (P01 to P33). (XLSX 18 kb) [file 12885_2019_5584_MOESM4_ESM.xlsx]

## Sheet: Suppl. Table 1
								Multiplex PCR-based NGS										Targeted capture-based NGS
ID	Sample group	Material	DNA concentration	DNA quality 260/280, 260/230	Average Target Cov.	delta Ct	Target Specifity	Low-cov. nucleotides 1	Zero-cov. bases	Variants	Artifacts	VUS	Polym.	False-positive	Pathogenic	DNA concentration	DNA quality 260/280, 260/230	Average Target Cov.	Target Specifity	Low-cov. nucleotides 2	Zero-cov. bases	Variants	Artifacts	VUS	Polym.	False-positive	Pathogenic
K01	Control	Blood	291 ng/µl	1.91, 2.46	6,666/7,597	n.d.	100%/100%	5.519	0	7	0	0	4	3	0	291 ng/µl	1.91, 2.46	776	0.65	0	0	5	0	0	5	0	0
K02			412 ng/µl	1.90, 2.39	7,471/7,970	n.d.	100%/100%	5.412	142	8	0	0	5	3	0	412 ng/µl	1.90, 2.39	880	0.62	0	0	6	0	0	6	0	0
K03			357 ng/µl	1.97, 2.26	8,717/8,985	n.d.	100%/100%	4.808	0	8	0	0	5	3	0	357 ng/µl	1.97, 2.26	732	0.66	0	0	6	0	0	6	0	0
K04			214 ng/µl	1.88, 2.40	12,534/11,370	n.d.	100%/100%	3.318	0	8	0	0	5	3	0	214 ng/µl	1.88, 2.40	633	0.67	0	0	6	0	0	6	0	0
K05			466 ng/µl	1.91, 2.31	9,025/9,840	n.d.	100%/100%	7.671	0	9	0	0	6	3	0	466 ng/µl	1.91, 2.31	902	0.65	0	0	7	0	0	7	0	0
P01	Routine diagnostic	FFPE tissue	161 ng/µl	1.88, 2.17	9,917/12,717	1.3	100%/100%	820	0	7	4	0	5	3	1	60 ng/µl	1.88, 2.17	243	0.68	0	0	6	0	0	5	0	1
P02			245 ng/µl	1.87, 2.25	12,212/15,266	0.9	100%/100%	544	0	8	3	0	7	3	1	90 ng/µl	1.87, 2.25	294	0.69	0	0	8	0	0	7	0	1
P03			83 ng/µl	1.89, 2.43	14,277/13,082	1.6	100%/100%	464	0	6	3	0	5	3	1	26 ng/µl	1.89, 2.43	353	0.68	0	0	6	0	0	5	0	1
P04			232 ng/µl	1.86, 2.37	11,772/11,901	0.8	100%/100%	1.907	0	8	4	0	6	3	1	108 ng/µl	1.86, 2.37	324	0.7	0	0	8	0	0	6	0	1
P05			50 ng/µl	1.90, 2.50	5,101/7,136	2.4	100%/100%	21,041	1.179	18	15	1	6	3	(0)	23 ng/µl	1.90, 2.50	348	0.7	0	0	7	0	0	6	0	1
P06			28 ng/µl	1.81, 1.81	5,306/5,293	3.2	100%/100%	1,648	119	7	3	0	6	3	1	13 ng/µl	1.81, 1.81	526	0.69	0	0	7	0	0	6	0	1
P07			518 ng/µl	2.05, n.d.	10,648/9,157	1.9	100%/100%	544	0	14	8	0	8	3	1	16 ng/µl	2.05, n.d.	383	0.71	0	0	9	0	0	8	0	1
P08			116 ng/µl	n.d.	19,658/18,268	-0.9	99%/99%	0	0	5	0	0	1	3	1	363 ng /µl	n.d.	519	0.65	0	0	3	0	0	2	0	1
P09			116 ng/µl	n.d.	16,413/17,062	0.6	100%/99%	0	0	4	0	0	1	3	0	152 ng/µl	n.d.	1.607	0.62	0	0	1	0	0	1	0	0
P10			102 ng/µl	1.88, 2.12	3,952/11,263	2.7	100%/100%	23,289	3.454	27	23	0	2	2	(0)	179 ng/µl	1.88, 2.12	1.226	0.63	0	0	5	0	0	4	0	1
P11			146 ng/µl	1.91, 2.41	15,831/14,664	-0.7	100%/100%	1,303	0	11	1	0	6	3	1	244 ng/µl	1.91, 2.41	2.668	0.6	0	0	7	0	0	6	0	1
P12			1,438 ng/µl	1.98, n.d.	6,199/9,860	-0.2	100%/100%	1,497	0	14	5	3	2	3	1	137 ng/µl	1.98, n.d.	1.349	0.62	0	0	3	0	0	2	0	1
P13			1,303 ng/µl	1.98, n.d.	9,244/12,432	-0.8	100%/100%	2,885	0	13	4	0	5	3	1	252 ng/µl	1.98, n.d.	1.45	0.62	0	0	8	0	1	6	0	1
P14	Test-DNA of very low quality	FFPE tissue	489 ng/µl	1.82, 2.11	463/1029	5.3	98%/99%	36.466	1.052	15	11	2	2	0	0	489 ng/µl	1.82, 2.11	566	0.72	4	0	5	0	2	3	0	0
P14			489 ng/µl	1.89, 2.18	2,392/557	5.3	97%/89%	26.963	3.372	34	28	4	2	0	0	489 ng/µl	1.89, 2.18	501	0.72	31	0	18	2	12	1	0	3
P15			1,164 ng/µl	1.84, 2.27	5,642/5,025	> 4.0	100%/100%	2.644	0	5	0	0	3	2	0	1,164 ng/µl	1.84, 2.27	454	0.69	5.549	5	5	2	1	3	0	1
P16	CNVs	Blood		not performed												243 ng/µl	1.80, 2.40	381	0.68	0	0	1	0	0	1	0	0
P17																?	?	140	0.65	356	0	7	0	0	7	0	0
P18																97 ng/µl	1.96, 2.17	209	0.65	42	0	3	0	0	3	0	0
P19																133 ng/µl	1.90, 2.26	245	0.69	7	0	4	0	0	4	0	0
P20																292 ng/µl	1.90, 2.40	490	0.67	0	0	3	0	0	0	0	0
P21																206 ng/µl	1.90, 2.40	467	0.66	0	0	6	0	0	6	0	0
P22																51 ng/µl	1.81, 3.01	396	0.68	0	0	3	0	1	2	0	0
P16	CNVs	FFPE tissue	127 ng/µl	2.06, 0.54	6,707/5,999	n.d.	99%/100%	227	0	42	36	1	5	0	0	127 ng/µl	2.06, 0.54	488	0.73	0	0	5	0	0	5	0	0
P17			498 ng/µl	1.97, 2.22	7,285/6,980	n.d.	100%/100%	9.945	138	85	80	1	5	0	0	498 ng/µl	1.97, 2.22	336	0.71	5.629	58	4	0	3	1	0	0
P18			259 ng/µl	1.98, 0.91	7,960/9,521	n.d.	100%/100%	2.387	0	18	15	0	3	0	0	259 ng/µl	1.98, 0.91	504	0.72	176	0	3	0	0	3	0	0
P19			76 ng/µl	2.06, 0.37	9,131/10,077	n.d.	99%/100%	979	0	11	8	0	3	0	0	76 ng/µl	2.06, 0.37	923	0.72	0	0	4	0	0	4	0	0
P20			21 ng/µl	1.95, 2.63	4,439/2,242	n.d.	99%/100%	2.857	259	117	113	1	3	0	0	21 ng/µl	1.95, 2.63	248	0.75	20	0	4	0	1	3	0	0
P23	Index patient testing	FFPE tissue		not performed												933 ng/µl	?	690	0.69	0	0	6	0	1	5	0	0
P24																?	?	220	0.71	23	0	18	1	7	9	0	1
P25																?	?	180	0.71	96	0	20	0	10	6	0	4
P26																107 ng/µl	2.12, n.d.	664	0.71	0	0	7	0	0	6	0	1
P27*																85 ng/µl	?	160	0.71	0	0	10	0	0	9	0	1
P28																?	?	248	0.7	30	0	10	0	2	6	0	2
P29																?	?	169	0.69	0	0	6	0	0	5	0	1
P30																?	?	336	0.66	5	0	7	0	1	6	0	0
P31																110 ng/µl	1.80, 1.40	135	0.7	7	0	3	0	1	2	0	0
P32																190 ng/µl	1.90, 1.70	669	0.69	0	0	5	0	0	5	0	0
P33																?	?	845	0.7	0	0	1	0	0	1	0	0
A nucleotide is designated as low covered target when < 500 (1) reads for Multiplex PCR-based NGS and < 30 (2) reads for Targeted capture-based NGS cover the corresponding nucleotide
* indicates tumor-free FFPE tissue
